# Supplementary material
Source: PubMed Central journal article supplement (PMC6154799)
Supplement: NIHMS988993-supplement-Supplemental_data.pdf [file NIHMS988993-supplement-Supplemental_data.pdf]

**Supplementary Appendix A: Details on costing of criminal activity**

**Appendix Table 1: Unit costs (2016 CAD) applied to self-reported incidents of criminal activity**

| <b>Cost Categories</b>                                                                                             | <b>Unit Cost</b> | <b>Source</b>                                  |
|--------------------------------------------------------------------------------------------------------------------|------------------|------------------------------------------------|
| <b>Incident Costs</b>                                                                                              |                  |                                                |
| <i>Violent offenses, income-related property crime, legal status violation, disorderly conduct, other offenses</i> | \$ 4,602         | (Krebs et al., 2014)                           |
| <b>Arrest processing/Court Costs</b>                                                                               |                  |                                                |
| <i>Violent offenses</i>                                                                                            | \$ 6,389         | (Krebs et al., 2014; Wall et al., 2000)        |
| <i>Income-related property crime</i>                                                                               | \$ 2,105         |                                                |
| <i>Drug dealing, sex work, legal status violations, disorderly conduct</i>                                         | \$ 1,867         |                                                |
| <i>Other offenses</i>                                                                                              | \$ 4,109         |                                                |
| <b>Corrections Costs (Monthly)</b>                                                                                 |                  |                                                |
| <i>Incarceration (based on 30 days incarcerated)</i>                                                               | \$ 5,449         | (Krebs et al., 2014; Wall et al., 2000)        |
| <i>Parole</i>                                                                                                      | \$ 5,683         |                                                |
| <i>Probation, conditional sentence, bail, community court</i>                                                      | \$ 1,426         |                                                |
| <b>Victimization Costs</b>                                                                                         |                  |                                                |
| <i>Assault</i>                                                                                                     | \$ 10,009        | (Krebs et al., 2014; McCollister et al., 2010) |
| <i>Break &amp; enter</i>                                                                                           | \$ 1,567         |                                                |
| <i>Theft</i>                                                                                                       | \$ 552           |                                                |
| <i>Income-related property crime (weighted average of Break &amp; Enter and theft)</i>                             | \$ 645           |                                                |

A set of eight categories of self-reported criminal activity (violent offenses, income-related property crime, drug dealing, sex work involvement, legal status violations, disorderly conduct, and other) were assessed in three dimensions: (1) number of days in the past month of active involvement; (2) average number of times per day activity took place; and (3) number of times arrested in the past month. Information on incarceration, parole or probation status as well as any community court dealings was included. Self-reported activity was multiplied by unit costs updated from (Krebs et al., 2014) and adjusted for inflation to 2016 CAD.

**Supplementary Appendix B:** Full results for regression analyses conducted in primary analysis and sensitivity analysis

**Appendix Table 2:** Full two-part multiple regression results for baseline specification with estimates for Parts I, II and combined AME for all covariates.

|                                  | <b>Part I</b>  |                 | <b>Part II</b> |                | <b>Combined</b> |                  |
|----------------------------------|----------------|-----------------|----------------|----------------|-----------------|------------------|
|                                  | <b>(Logit)</b> |                 | <b>(GLM)</b>   |                | <b>(AME)</b>    |                  |
| <b>Daily Crack</b>               | 0.316*         | [-0.034,0.665]  | 0.626          | [-0.198,1.449] | \$4441*         | [-\$153,\$9034]  |
| <b>Non-Daily Crack</b>           | 0.252*         | [-0.043,0.548]  | 0.484          | [-0.284,1.252] | \$3464          | [-\$830,\$7758]  |
| <b>Daily Meth</b>                | 0.798***       | [0.339,1.256]   | 0.564          | [-0.345,1.472] | \$5845**        | [\$663,\$11028]  |
| <b>Non-Daily Meth</b>            | 0.408**        | [0.095,0.721]   | 0.806***       | [0.200,1.412]  | \$5723***       | [\$2013,\$9434]  |
| <b>Daily Polystimulant</b>       | 0.602***       | [0.285,0.919]   | 1.273***       | [0.579,1.968]  | \$8893***       | [\$4196,\$13589] |
| <b>Non-Daily Polystimulant</b>   | 0.514***       | [0.261,0.766]   | 0.682**        | [0.155,1.209]  | \$5449***       | [\$2180,\$8718]  |
| <b>Cocaine</b>                   | 0.077          | [-0.281,0.435]  | 1.057***       | [0.268,1.846]  | \$5864**        | [\$1220,\$10508] |
| <b>Treatment (OAT)</b>           | -0.444***      | [-0.757,-0.131] | -0.402         | [-1.203,0.398] | -\$3722         | [-\$8213,\$769]  |
| <b>Other treatment (Non-OAT)</b> | 0.822***       | [0.540,1.104]   | -0.305         | [-1.045,0.435] | \$1336          | [-\$2672,\$5343] |
| <b>Age</b>                       | 0.025          | [-0.035,0.085]  | -0.04          | [-0.172,0.092] | -\$131**        | [-\$241,-\$22]   |
| <b>Age<sup>2</sup></b>           | -0.001**       | [-0.002,-0.000] | 0.001          | [-0.001,0.002] | -               | -                |
| <b>Male</b>                      | 0.641***       | [0.422,0.859]   | -0.416*        | [-0.843,0.011] | \$99            | [-\$2265,\$2462] |
| <b>High School</b>               | -0.121         | [-0.318,0.076]  | 0.281          | [-0.104,0.666] | \$1050          | [-\$1154,\$3255] |
| <b>Ever in jail</b>              | 0.559***       | [0.334,0.785]   | -0.103         | [-0.580,0.374] | \$1460          | [-\$1170,\$4090] |
| <b>Mental health 16m</b>         | 0.031          | [-0.139,0.201]  | -0.32          | [-0.708,0.069] | -\$1581         | [-\$3851,\$689]  |
| <b>Homeless 16m</b>              | 0.587***       | [0.381,0.792]   | 0.565***       | [0.151,0.979]  | \$5092***       | [\$2383,\$7801]  |
| <b>Employment 16m</b>            | -0.283***      | [-0.478,-0.088] | -0.321         | [-0.726,0.085] | -\$2710**       | [-\$5128,-\$293] |
| <b>Opioid</b>                    | 0.392***       | [0.211,0.572]   | 0.343*         | [-0.039,0.725] | \$3221***       | [\$925,\$5517]   |
| <b>Alcohol</b>                   | 0.228**        | [0.048,0.407]   | -0.158         | [-0.520,0.204] | -\$18           | [-\$2035,\$1998] |
| <b>Constant</b>                  | -2.325***      | [-3.548,-1.102] | 10.304***      | [7.825,12.782] | -               | -                |

Observations: 5299

95% confidence intervals in brackets

\* p<0.1, \*\* p<0.05, \*\*\* p<0.01

**Appendix Table 3:** Full two-part multiple regression results for injection vs. non-injection in MA subgroup analysis for Parts I, II and combined AME for all covariates.

|                                           | <b>Part I<br/>(Logit)</b> |                 | <b>Part II<br/>(GLM)</b> |                | <b>Combined<br/>(AME)</b> |                   |
|-------------------------------------------|---------------------------|-----------------|--------------------------|----------------|---------------------------|-------------------|
| <b>Meth Injection</b>                     | 0.25                      | [-0.101,0.601]  | 0.584                    | [-0.145,1.313] | \$6327*                   | [-\$835,\$13490]  |
| <b>Meth Injection &amp; Non-injection</b> | -0.035                    | [-0.350,0.279]  | 0.174                    | [-0.393,0.740] | \$1349                    | [-\$3849,\$6547]  |
| <b>Polystimulant</b>                      | 0.16                      | [-0.132,0.453]  | -0.002                   | [-0.581,0.576] | \$759                     | [-\$4510,\$6027]  |
| <b>Treatment (OAT)</b>                    | -0.285                    | [-0.848,0.278]  | -0.606                   | [-1.771,0.558] | -\$6694                   | [-\$17758,\$4370] |
| <b>Other treatment (Non-OAT)</b>          | 0.550**                   | [0.050,1.050]   | 0.212                    | [-0.774,1.199] | \$4531                    | [-\$4541,\$13603] |
| <b>Age</b>                                | -0.013                    | [-0.130,0.105]  | 0.037                    | [-0.184,0.257] | -\$330**                  | [-\$644,-\$16]    |
| <b>Age<sup>2</sup></b>                    | -0.001                    | [-0.002,0.001]  | -0.001                   | [-0.004,0.002] | -                         | -                 |
| <b>Male</b>                               | 0.559***                  | [0.188,0.931]   | 0.146                    | [-0.398,0.690] | \$4000                    | [-\$1433,\$9433]  |
| <b>High School</b>                        | -0.379**                  | [-0.708,-0.050] | 0.19                     | [-0.384,0.763] | -\$182                    | [-\$5405,\$5041]  |
| <b>Ever in jail</b>                       | 0.492**                   | [0.116,0.868]   | 0.163                    | [-0.450,0.775] | \$3818                    | [-\$2048,\$9684]  |
| <b>Mental health 16m</b>                  | 0.05                      | [-0.237,0.337]  | -0.364                   | [-0.910,0.181] | -\$2944                   | [-\$8250,\$2363]  |
| <b>Homeless 16m</b>                       | 0.469***                  | [0.174,0.763]   | 0.319                    | [-0.253,0.891] | \$5073*                   | [-\$288,\$10433]  |
| <b>Employment 16m</b>                     | -0.359**                  | [-0.675,-0.043] | -0.329                   | [-0.883,0.224] | -\$4629*                  | [-\$9942,\$684]   |
| <b>Opioid</b>                             | 0.559***                  | [0.249,0.869]   | 0.403                    | [-0.206,1.011] | \$6244**                  | [\$96,\$12392]    |
| <b>Alcohol</b>                            | 0.359**                   | [0.066,0.651]   | 0.079                    | [-0.418,0.576] | \$2437                    | [-\$2051,\$6925]  |
| <b>Constant</b>                           | -0.829                    | [-2.908,1.249]  | 8.843***                 | [5.007,12.678] | -                         | -                 |

Observations: 1413

95% confidence intervals in brackets

\* p<0.1, \*\* p<0.05, \*\*\* p<0.01

**Appendix Table 4:** Sensitivity analysis for alternative payer perspectives for monthly crime costs associated with mutually exclusive categories of stimulant use, relative to stimulant abstinence, derived from two-part multiple regression results (2016 CAD).

|                                  | Third-Party Payer |                  |                   | Arrests & Convictions |                 |
|----------------------------------|-------------------|------------------|-------------------|-----------------------|-----------------|
|                                  |                   | (1)              |                   | (2)                   |                 |
| <b>Crack Cocaine</b>             | Daily             | \$4031*          | [-\$48, \$8110]   | \$84                  | [-\$56, \$223]  |
|                                  | Non-daily         | \$3309*          | [-\$556, \$7173]  | \$37                  | [-\$83, \$156]  |
|                                  | No use            | <i>Reference</i> |                   | <i>Reference</i>      |                 |
| <b>Methamphetamine</b>           | Daily             | \$4850**         | [\$133, \$9568]   | \$186**               | [\$21, \$352]   |
|                                  | Non-daily         | \$4688***        | [\$1346, \$8029]  | \$92                  | [-\$28, \$212]  |
|                                  | No use            | <i>Reference</i> |                   | <i>Reference</i>      |                 |
| <b>Polystimulant</b>             | Daily             | \$7976***        | [\$3787, \$12166] | \$286***              | [\$144, \$428]  |
|                                  | Non-daily         | \$5031***        | [\$2067, \$7994]  | \$173***              | [\$73, \$274]   |
|                                  | No use            | <i>Reference</i> |                   | <i>Reference</i>      |                 |
| <b>Powdered Cocaine</b>          | Any use           | \$5144**         | [\$1033, \$9255]  | -\$8                  | [-\$148, \$132] |
|                                  | No use            | <i>Reference</i> |                   | <i>Reference</i>      |                 |
| <b>Treatment (OAT)</b>           | Yes               | -\$3630*         | [-\$7741, \$481]  | -\$183***             | [-\$310, -\$56] |
|                                  | No                | <i>Reference</i> |                   | <i>Reference</i>      |                 |
| <b>Other treatment (non-OAT)</b> | Yes               | \$1475           | [-\$2162, \$5111] | \$291***              | [\$176, \$407]  |
|                                  | No                | <i>Reference</i> |                   | <i>Reference</i>      |                 |

Observations: 5299

Control variables include: age, gender, education, history of incarceration, mental health issues, employment, homelessness, opioid use, and alcohol use

Average marginal effects presented with 95% confidence intervals in brackets

\* p<0.1, \*\* p<0.05, \*\*\* p<0.01

**Appendix Table 5:** Sensitivity analysis for threshold change to crime cost outliers for monthly crime costs associated with mutually exclusive categories of stimulant use, relative to stimulant abstinence, derived from two-part multiple regression results (2016 CAD).

|                                  |           | > 98 <sup>th</sup> Percentile Excluded (Base Model)<br>(n = 5299)<br>(1) |                    | > 95 <sup>th</sup> Percentile Excluded<br>(n = 5268)<br>(2) |                   | > 98 <sup>th</sup> Percentile Included<br>(n = 5322)<br>(3) |                     |
|----------------------------------|-----------|--------------------------------------------------------------------------|--------------------|-------------------------------------------------------------|-------------------|-------------------------------------------------------------|---------------------|
| <b>Crack Cocaine</b>             | Daily     | \$4441*                                                                  | [-\$153, \$9034]   | \$2114                                                      | [-\$519, \$4746]  | \$8776                                                      | [-\$3606, \$21157]  |
|                                  | Non-daily | \$3464                                                                   | [-\$830, \$7758]   | \$414                                                       | [-\$1180, \$2007] | \$5430                                                      | [-\$6842, \$17702]  |
|                                  | No use    | <i>Reference</i>                                                         |                    | <i>Reference</i>                                            |                   | <i>Reference</i>                                            |                     |
| <b>Methamphetamine</b>           | Daily     | \$5845**                                                                 | [\$663, \$11,028]  | \$476                                                       | [-\$1480, \$2432] | -\$1162                                                     | [-\$15457, \$13132] |
|                                  | Non-daily | \$5723***                                                                | [\$2013, \$9434]   | \$3831***                                                   | [\$1758, \$5904]  | \$9017*                                                     | [-\$1690, \$19723]  |
|                                  | No use    | <i>Reference</i>                                                         |                    | <i>Reference</i>                                            |                   | <i>Reference</i>                                            |                     |
| <b>Polystimulant</b>             | Daily     | \$8893***                                                                | [\$4196, \$13,589] | \$3230***                                                   | [\$1159, \$5301]  | \$19808***                                                  | [\$6259, \$33357]   |
|                                  | Non-daily | \$5449***                                                                | [\$2180, \$8719]   | \$2212***                                                   | [\$621, \$3802]   | \$2511                                                      | [-\$7032, \$12053]  |
|                                  | No use    | <i>Reference</i>                                                         |                    | <i>Reference</i>                                            |                   | <i>Reference</i>                                            |                     |
| <b>Powdered Cocaine</b>          | Any use   | \$5864**                                                                 | [\$1220, \$10,508] | \$1650                                                      | [-\$441, \$3742]  | \$13352*                                                    | [-\$2016, \$28721]  |
|                                  | No use    | <i>Reference</i>                                                         |                    | <i>Reference</i>                                            |                   | <i>Reference</i>                                            |                     |
| <b>Treatment (OAT)</b>           | Yes       | -\$3722                                                                  | [-\$8213, \$769]   | -\$411                                                      | [-\$1925, \$1104] | -\$11430                                                    | [-\$25766, \$2907]  |
|                                  | No        | <i>Reference</i>                                                         |                    | <i>Reference</i>                                            |                   | <i>Reference</i>                                            |                     |
| <b>Other treatment (non-OAT)</b> | Yes       | \$1336                                                                   | [-\$2672, \$5343]  | -\$98                                                       | [-\$1482, \$1285] | \$3173                                                      | [-\$9119, \$15466]  |
|                                  | No        | <i>Reference</i>                                                         |                    | <i>Reference</i>                                            |                   | <i>Reference</i>                                            |                     |

Control variables include: age, gender, education, history of incarceration, mental health issues, employment, homelessness, opioid use, and alcohol use

Average marginal effects presented with 95% confidence intervals in brackets

\* p<0.1, \*\* p<0.05, \*\*\* p<0.01

**Appendix Table 6:** Full Part I logistic regression results for sensitivity analysis from alternative payer perspectives.

|                                  | Third-Party Payer |                 | Arrests & Convictions |                 |
|----------------------------------|-------------------|-----------------|-----------------------|-----------------|
|                                  | (1)               |                 | (2)                   |                 |
| <b>Daily Crack</b>               | 0.316*            | [-0.034,0.665]  | 0.328*                | [-0.036,0.692]  |
| <b>Non-Daily Crack</b>           | 0.252*            | [-0.043,0.548]  | 0.227                 | [-0.080,0.533]  |
| <b>Daily Meth</b>                | 0.798***          | [0.339,1.256]   | 0.806***              | [0.321,1.292]   |
| <b>Non-Daily Meth</b>            | 0.408**           | [0.095,0.721]   | 0.337**               | [0.009,0.666]   |
| <b>Daily Polystimulant</b>       | 0.602***          | [0.285,0.919]   | 0.633***              | [0.305,0.961]   |
| <b>Non-Daily Polystimulant</b>   | 0.514***          | [0.261,0.766]   | 0.523***              | [0.256,0.789]   |
| <b>Cocaine</b>                   | 0.077             | [-0.281,0.435]  | -0.025                | [-0.408,0.358]  |
| <b>Treatment (OAT)</b>           | -0.444***         | [-0.757,-0.131] | -0.365**              | [-0.688,-0.043] |
| <b>Other treatment (Non-OAT)</b> | 0.822***          | [0.540,1.104]   | 0.866***              | [0.575,1.156]   |
| <b>Age</b>                       | 0.025             | [-0.035,0.085]  | 0.045                 | [-0.020,0.111]  |
| <b>Age<sup>2</sup></b>           | -0.001**          | [-0.002,-0.000] | -0.001***             | [-0.002,-0.000] |
| <b>Male</b>                      | 0.641***          | [0.422,0.859]   | 0.739***              | [0.507,0.971]   |
| <b>High School</b>               | -0.121            | [-0.318,0.076]  | -0.105                | [-0.314,0.104]  |
| <b>Ever in jail</b>              | 0.559***          | [0.334,0.785]   | 0.653***              | [0.404,0.902]   |
| <b>Mental health 16m</b>         | 0.031             | [-0.139,0.201]  | 0.006                 | [-0.172,0.185]  |
| <b>Homeless 16m</b>              | 0.587***          | [0.381,0.792]   | 0.532***              | [0.318,0.747]   |
| <b>Employment 16m</b>            | -0.283***         | [-0.478,-0.088] | -0.347***             | [-0.555,-0.139] |
| <b>Opioid</b>                    | 0.392***          | [0.211,0.572]   | 0.347***              | [0.158,0.536]   |
| <b>Alcohol</b>                   | 0.228**           | [0.048,0.407]   | 0.115                 | [-0.080,0.309]  |
| <b>Constant</b>                  | -2.325***         | [-3.548,-1.102] | -2.978***             | [-4.292,-1.664] |

Observations: 5299

95% confidence intervals in brackets

\* p<0.1, \*\* p<0.05, \*\*\* p<0.01

**Appendix Table 7:** Full Part II GLM results for sensitivity analysis from alternative payer perspectives.

|                                  | Third-Party Payer |                | Arrests & Convictions |                |
|----------------------------------|-------------------|----------------|-----------------------|----------------|
|                                  | (1)               | (2)            | (1)                   | (2)            |
| <b>Daily Crack</b>               | 0.643             | [-0.178,1.464] | -0.035                | [-0.239,0.168] |
| <b>Non-Daily Crack</b>           | 0.533             | [-0.241,1.306] | -0.074                | [-0.252,0.104] |
| <b>Daily Meth</b>                | 0.489             | [-0.449,1.427] | -0.132                | [-0.321,0.057] |
| <b>Non-Daily Meth</b>            | 0.720**           | [0.096,1.345]  | -0.022                | [-0.180,0.137] |
| <b>Daily Polystimulant</b>       | 1.288***          | [0.596,1.981]  | 0.225*                | [-0.000,0.450] |
| <b>Non-Daily Polystimulant</b>   | 0.721***          | [0.193,1.250]  | 0.038                 | [-0.103,0.179] |
| <b>Cocaine</b>                   | 1.043***          | [0.256,1.831]  | -0.001                | [-0.186,0.185] |
| <b>Treatment (OAT)</b>           | -0.47             | [-1.288,0.348] | -0.172*               | [-0.360,0.016] |
| <b>Other treatment (Non-OAT)</b> | -0.247            | [-1.001,0.508] | 0.073                 | [-0.103,0.249] |
| <b>Age</b>                       | -0.043            | [-0.175,0.089] | -0.008                | [-0.045,0.029] |
| <b>Age<sup>2</sup></b>           | 0.001             | [-0.001,0.002] | 0                     | [-0.000,0.001] |
| <b>Male</b>                      | -0.404*           | [-0.829,0.022] | -0.008                | [-0.131,0.115] |
| <b>High School</b>               | 0.3               | [-0.092,0.692] | 0.028                 | [-0.071,0.127] |
| <b>Ever in jail</b>              | -0.15             | [-0.636,0.335] | 0.130**               | [0.012,0.249]  |
| <b>Mental health 16m</b>         | -0.336*           | [-0.724,0.051] | -0.03                 | [-0.127,0.068] |
| <b>Homeless 16m</b>              | 0.522**           | [0.104,0.940]  | 0.191***              | [0.069,0.314]  |
| <b>Employment 16m</b>            | -0.3              | [-0.711,0.112] | -0.077                | [-0.199,0.045] |
| <b>Opioid</b>                    | 0.313             | [-0.075,0.702] | 0.197***              | [0.096,0.299]  |
| <b>Alcohol</b>                   | -0.174            | [-0.544,0.196] | 0.052                 | [-0.058,0.162] |
| <b>Constant</b>                  | 10.298***         | [7.805,12.790] | 7.688***              | [6.957,8.419]  |

Observations: 5299

95% confidence intervals in brackets

\* p<0.1, \*\* p<0.05, \*\*\* p<0.01

**Appendix Table 8:** Full Part I logistic regression results for sensitivity analysis to outlier threshold.

|                                  | <b>&gt; 98<sup>th</sup> Percentile Excluded (Base Model)</b> |                 | <b>&gt; 95<sup>th</sup> Percentile Excluded</b> |                 | <b>&gt; 98<sup>th</sup> Percentile Included</b> |                 |
|----------------------------------|--------------------------------------------------------------|-----------------|-------------------------------------------------|-----------------|-------------------------------------------------|-----------------|
|                                  | <b>(n = 5299)</b>                                            |                 | <b>(n = 5268)</b>                               |                 | <b>(n = 5322)</b>                               |                 |
|                                  | <b>(1)</b>                                                   |                 | <b>(2)</b>                                      |                 | <b>(3)</b>                                      |                 |
| <b>Daily Crack</b>               | 0.316*                                                       | [-0.034,0.665]  | 0.290*                                          | [-0.055,0.635]  | 0.335*                                          | [-0.012,0.681]  |
| <b>Non-Daily Crack</b>           | 0.252*                                                       | [-0.043,0.548]  | 0.238                                           | [-0.062,0.538]  | 0.249*                                          | [-0.044,0.542]  |
| <b>Daily Meth</b>                | 0.798***                                                     | [0.339,1.256]   | 0.762***                                        | [0.309,1.216]   | 0.783***                                        | [0.324,1.242]   |
| <b>Non-Daily Meth</b>            | 0.408**                                                      | [0.095,0.721]   | 0.403**                                         | [0.088,0.718]   | 0.403**                                         | [0.092,0.714]   |
| <b>Daily Polystimulant</b>       | 0.602***                                                     | [0.285,0.919]   | 0.552***                                        | [0.233,0.871]   | 0.640***                                        | [0.323,0.958]   |
| <b>Non-Daily Polystimulant</b>   | 0.514***                                                     | [0.261,0.766]   | 0.510***                                        | [0.257,0.763]   | 0.501***                                        | [0.251,0.751]   |
| <b>Cocaine</b>                   | 0.077                                                        | [-0.281,0.435]  | 0.002                                           | [-0.363,0.366]  | 0.095                                           | [-0.260,0.451]  |
| <b>Treatment (OAT)</b>           | -0.444***                                                    | [-0.757,-0.131] | -0.428***                                       | [-0.748,-0.109] | -0.448***                                       | [-0.761,-0.134] |
| <b>Other treatment (Non-OAT)</b> | 0.822***                                                     | [0.540,1.104]   | 0.825***                                        | [0.537,1.113]   | 0.808***                                        | [0.526,1.091]   |
| <b>Age</b>                       | 0.025                                                        | [-0.035,0.085]  | 0.029                                           | [-0.031,0.089]  | 0.019                                           | [-0.040,0.079]  |
| <b>Age<sup>2</sup></b>           | -0.001**                                                     | [-0.002,-0.000] | -0.001**                                        | [-0.002,-0.000] | -0.001**                                        | [-0.002,-0.000] |
| <b>Male</b>                      | 0.641***                                                     | [0.422,0.859]   | 0.651***                                        | [0.432,0.869]   | 0.640***                                        | [0.421,0.859]   |
| <b>High School</b>               | -0.121                                                       | [-0.318,0.076]  | -0.131                                          | [-0.328,0.065]  | -0.119                                          | [-0.317,0.078]  |
| <b>Ever in jail</b>              | 0.559***                                                     | [0.334,0.785]   | 0.565***                                        | [0.339,0.792]   | 0.577***                                        | [0.352,0.801]   |
| <b>Mental health 16m</b>         | 0.031                                                        | [-0.139,0.201]  | 0.03                                            | [-0.140,0.200]  | 0.044                                           | [-0.126,0.213]  |
| <b>Homeless 16m</b>              | 0.587***                                                     | [0.381,0.792]   | 0.566***                                        | [0.359,0.773]   | 0.634***                                        | [0.428,0.840]   |
| <b>Employment 16m</b>            | -0.283***                                                    | [-0.478,-0.088] | -0.261***                                       | [-0.456,-0.067] | -0.299***                                       | [-0.493,-0.106] |
| <b>Opioid</b>                    | 0.392***                                                     | [0.211,0.572]   | 0.381***                                        | [0.202,0.560]   | 0.387***                                        | [0.206,0.568]   |
| <b>Alcohol</b>                   | 0.228**                                                      | [0.048,0.407]   | 0.254***                                        | [0.072,0.435]   | 0.235***                                        | [0.057,0.414]   |
| <b>Constant</b>                  | -2.325***                                                    | [-3.548,-1.102] | -2.421***                                       | [-3.633,-1.208] | -2.230***                                       | [-3.438,-1.023] |

95% confidence intervals in brackets

\* p<0.1, \*\* p<0.05, \*\*\* p<0.01

**Appendix Table 9:** Full Part II GLM results for sensitivity analysis to outlier threshold.

|                                  | <b>&gt; 98<sup>th</sup> Percentile Excluded (Base Model)</b><br><b>(n = 5299)</b> |                | <b>&gt; 95<sup>th</sup> Percentile Excluded</b><br><b>(n = 5268)</b> |                 | <b>&gt; 98<sup>th</sup> Percentile Included</b><br><b>(n = 5322)</b> |                 |
|----------------------------------|-----------------------------------------------------------------------------------|----------------|----------------------------------------------------------------------|-----------------|----------------------------------------------------------------------|-----------------|
|                                  | <b>(1)</b>                                                                        |                | <b>(2)</b>                                                           |                 | <b>(3)</b>                                                           |                 |
| <b>Daily Crack</b>               | 0.626                                                                             | [-0.198,1.449] | 0.56                                                                 | [-0.327,1.448]  | 0.461                                                                | [-0.456,1.377]  |
| <b>Non-Daily Crack</b>           | 0.484                                                                             | [-0.284,1.252] | -0.015                                                               | [-0.549,0.518]  | 0.26                                                                 | [-0.652,1.171]  |
| <b>Daily Meth</b>                | 0.564                                                                             | [-0.345,1.472] | -0.356                                                               | [-0.988,0.276]  | -0.558                                                               | [-1.584,0.468]  |
| <b>Non-Daily Meth</b>            | 0.806***                                                                          | [0.200,1.412]  | 1.100***                                                             | [0.516,1.684]   | 0.437                                                                | [-0.328,1.203]  |
| <b>Daily Polystimulant</b>       | 1.273***                                                                          | [0.579,1.968]  | 0.781**                                                              | [0.146,1.417]   | 1.108***                                                             | [0.294,1.923]   |
| <b>Non-Daily Polystimulant</b>   | 0.682**                                                                           | [0.155,1.209]  | 0.444*                                                               | [-0.063,0.950]  | -0.112                                                               | [-0.825,0.602]  |
| <b>Cocaine</b>                   | 1.057***                                                                          | [0.268,1.846]  | 0.593*                                                               | [-0.093,1.279]  | 0.949*                                                               | [-0.072,1.971]  |
| <b>Treatment (OAT)</b>           | -0.402                                                                            | [-1.203,0.398] | 0.148                                                                | [-0.355,0.652]  | -0.593                                                               | [-1.546,0.361]  |
| <b>Other treatment (Non-OAT)</b> | -0.305                                                                            | [-1.045,0.435] | -0.606***                                                            | [-1.063,-0.148] | -0.246                                                               | [-1.156,0.663]  |
| <b>Age</b>                       | -0.04                                                                             | [-0.172,0.092] | -0.058                                                               | [-0.171,0.055]  | -0.169**                                                             | [-0.312,-0.025] |
| <b>Age<sup>2</sup></b>           | 0.001                                                                             | [-0.001,0.002] | 0.001                                                                | [-0.001,0.002]  | 0.002**                                                              | [0.000,0.004]   |
| <b>Male</b>                      | -0.416*                                                                           | [-0.843,0.011] | -0.563***                                                            | [-0.963,-0.162] | -0.365*                                                              | [-0.797,0.067]  |
| <b>High School</b>               | 0.281                                                                             | [-0.104,0.666] | 0.004                                                                | [-0.329,0.336]  | 0.319                                                                | [-0.137,0.774]  |
| <b>Ever in jail</b>              | -0.103                                                                            | [-0.580,0.374] | 0.28                                                                 | [-0.108,0.669]  | 0.458*                                                               | [-0.068,0.984]  |
| <b>Mental health 16m</b>         | -0.32                                                                             | [-0.708,0.069] | -0.1                                                                 | [-0.420,0.221]  | -0.259                                                               | [-0.657,0.138]  |
| <b>Homeless 16m</b>              | 0.565***                                                                          | [0.151,0.979]  | 0.24                                                                 | [-0.098,0.577]  | 1.482***                                                             | [1.020,1.944]   |
| <b>Employment 16m</b>            | -0.321                                                                            | [-0.726,0.085] | 0.104                                                                | [-0.237,0.446]  | -0.609**                                                             | [-1.082,-0.135] |
| <b>Opioid</b>                    | 0.343*                                                                            | [-0.039,0.725] | 0.326*                                                               | [-0.019,0.671]  | 0.327                                                                | [-0.101,0.756]  |
| <b>Alcohol</b>                   | -0.158                                                                            | [-0.520,0.204] | 0.517***                                                             | [0.201,0.834]   | 0.022                                                                | [-0.384,0.428]  |
| <b>Constant</b>                  | 10.304***                                                                         | [7.825,12.782] | 10.009***                                                            | [7.925,12.093]  | 13.130***                                                            | [10.424,15.835] |

95% confidence intervals in brackets

\* p<0.1, \*\* p<0.05, \*\*\* p<0.01

**Appendix Table 10:** Full results for fixed effects logistic regression sensitivity analysis for Part I of baseline specification.

|                                  | Baseline Part I (Logit)<br>(n=5299) |                 | Fixed Effects Part I (Logit)<br>(n=1795) |                 |
|----------------------------------|-------------------------------------|-----------------|------------------------------------------|-----------------|
|                                  | (1)                                 |                 | (2)                                      |                 |
| <b>Daily Crack</b>               | 0.316*                              | [-0.034,0.665]  | 0.182                                    | [-0.445,0.809]  |
| <b>Non-Daily Crack</b>           | 0.252*                              | [-0.043,0.548]  | 0.152                                    | [-0.340,0.644]  |
| <b>Daily Meth</b>                | 0.798***                            | [0.339,1.256]   | 0.979**                                  | [0.204,1.755]   |
| <b>Non-Daily Meth</b>            | 0.408**                             | [0.095,0.721]   | 0.174                                    | [-0.367,0.715]  |
| <b>Daily Polystimulant</b>       | 0.602***                            | [0.285,0.919]   | 0.103                                    | [-0.462,0.669]  |
| <b>Non-Daily Polystimulant</b>   | 0.514***                            | [0.261,0.766]   | 0.438*                                   | [-0.023,0.900]  |
| <b>Cocaine</b>                   | 0.077                               | [-0.281,0.435]  | 0.353                                    | [-0.217,0.923]  |
| <b>Treatment (OAT)</b>           | -0.444***                           | [-0.757,-0.131] | 0.337                                    | [-0.278,0.952]  |
| <b>Other treatment (Non-OAT)</b> | 0.822***                            | [0.540,1.104]   | 0.381                                    | [-0.075,0.836]  |
| <b>Age</b>                       | 0.025                               | [-0.035,0.085]  | 0.378*                                   | [-0.038,0.793]  |
| <b>Age<sup>2</sup></b>           | -0.001**                            | [-0.002,-0.000] | -0.007***                                | [-0.012,-0.003] |
| <b>Male</b>                      | 0.641***                            | [0.422,0.859]   | -                                        | <i>Omitted</i>  |
| <b>High School</b>               | -0.121                              | [-0.318,0.076]  | -                                        | <i>Omitted</i>  |
| <b>Ever in jail</b>              | 0.559***                            | [0.334,0.785]   | -                                        | <i>Omitted</i>  |
| <b>Mental health 16m</b>         | 0.031                               | [-0.139,0.201]  | 0.247*                                   | [-0.037,0.532]  |
| <b>Homeless 16m</b>              | 0.587***                            | [0.381,0.792]   | 0.273*                                   | [-0.042,0.589]  |
| <b>Employment 16m</b>            | -0.283***                           | [-0.478,-0.088] | -0.103                                   | [-0.430,0.225]  |
| <b>Opioid</b>                    | 0.392***                            | [0.211,0.572]   | 0.035                                    | [-0.291,0.362]  |
| <b>Alcohol</b>                   | 0.228**                             | [0.048,0.407]   | 0.124                                    | [-0.177,0.425]  |
| <b>Constant</b>                  | -2.325***                           | [-3.548,-1.102] | -2.978***                                | [-4.292,-1.664] |

95% confidence intervals in brackets

\* p<0.1, \*\* p<0.05, \*\*\* p<0.01
